# Supplementary material
Source: Springer Nature journal article supplement (https://www.springermedizin.de/resource/supplementary/13058_2013_3363_MOESM8_ESM.pdf/9703954)

**A. DFS**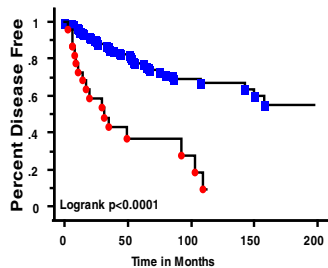

At Risk

|                |     |     |    |    |   |
|----------------|-----|-----|----|----|---|
| AR:ER < 2      | 169 | 114 | 37 | 16 | 0 |
| AR:ER $\geq 2$ | 22  | 6   | 3  | 0  | 0 |

**B. DSS**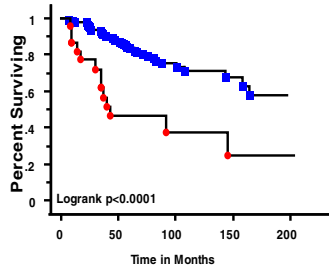

At Risk

|                |     |     |    |    |   |
|----------------|-----|-----|----|----|---|
| AR:ER < 2      | 167 | 119 | 39 | 17 | 0 |
| AR:ER $\geq 2$ | 22  | 8   | 4  | 2  | 0 |

**C. DFS while on tamoxifen**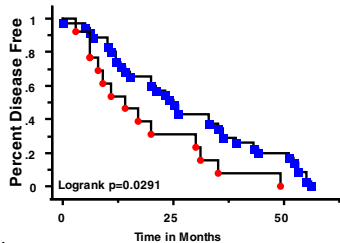

At Risk

|                |    |    |    |    |   |   |
|----------------|----|----|----|----|---|---|
| AR:ER < 2      | 25 | 27 | 17 | 10 | 7 | 0 |
| AR:ER $\geq 2$ | 13 | 7  | 4  | 1  | 0 | 0 |

**D. DSS while on tamoxifen**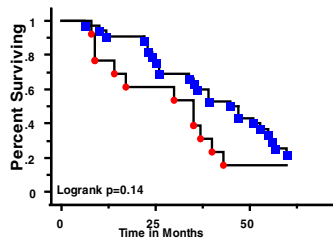

At Risk

|                |    |    |    |    |    |   |
|----------------|----|----|----|----|----|---|
| AR:ER < 2      | 34 | 30 | 24 | 18 | 13 | 6 |
| AR:ER $\geq 2$ | 13 | 10 | 8  | 4  | 1  | 1 |

**E.**

AR:ER &lt; 2.0

AR:ER  $\geq 2.0$ 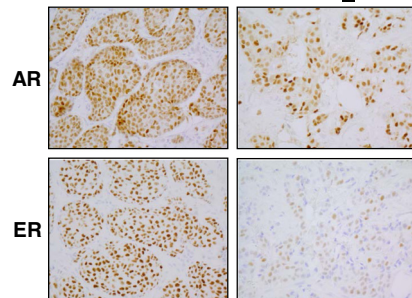

Supplement: MOESM8 [file 9703954]
